# Supplementary material for: Journeys in crystal energy landscapes: actual and virtual structures in polymorphic 5-nitrobenzo[c][1,2,5]thiadiazole
Source: Royal Society of Chemistry journal article supplement (doi:10.1039/d2ce01619b), 2023-01-01
Supplement: d2ce01619b1.pdf [file d2ce01619b1.pdf]

### Supporting Information

for the typescript entitled “Journeys in crystal energy landscapes: actual and virtual structures in polymorphic 5-nitrobenzo[*c*][1,2,5]thiadiazole” by Francesco Silvio Gentile, Emmanuele Parisi and Roberto Centore

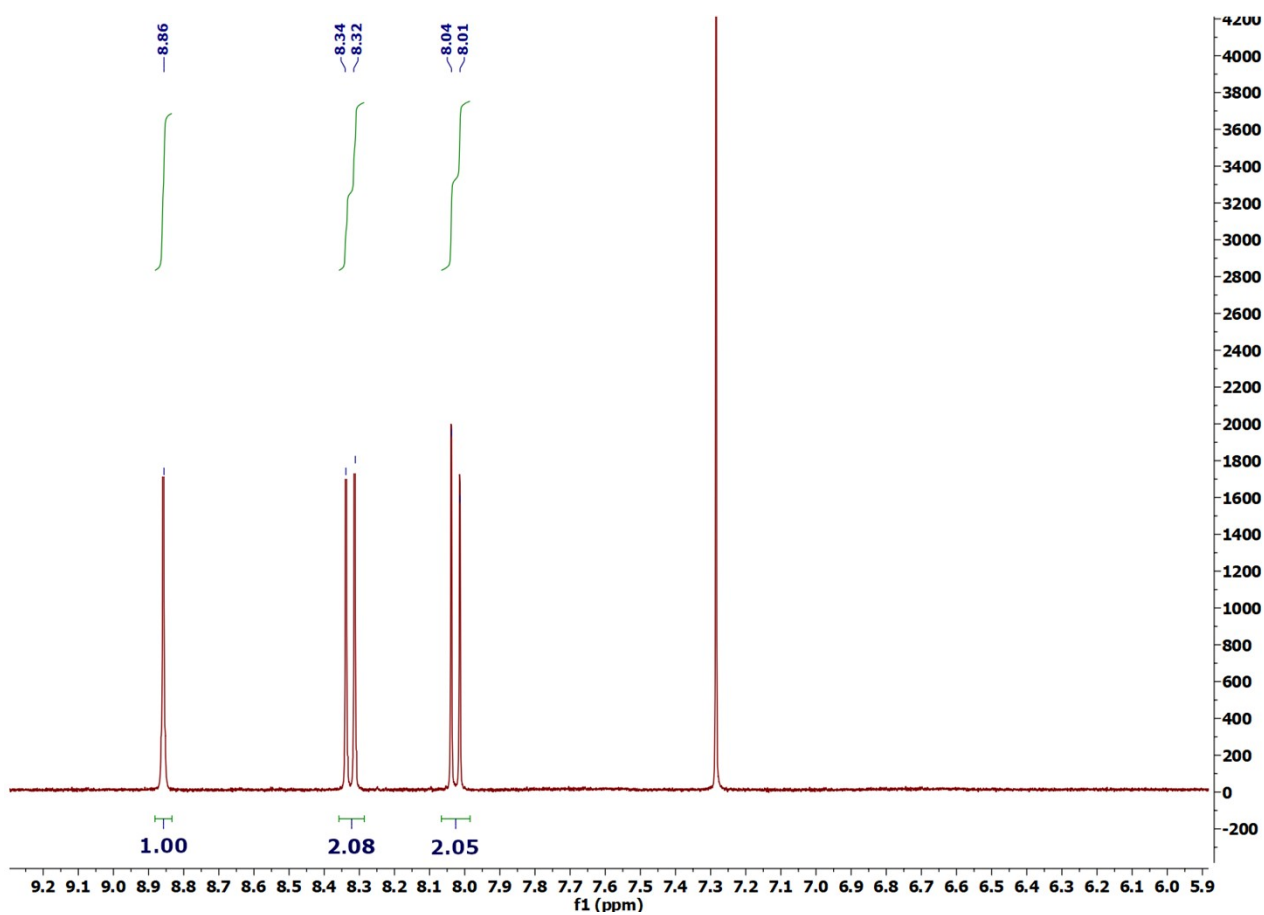

Fig. S1.  $^1\text{H-NMR}$  spectrum of **1**, in  $\text{CDCl}_3$  as solvent. The signal near 7.3 ppm is due to residual  $\text{CHCl}_3$ .

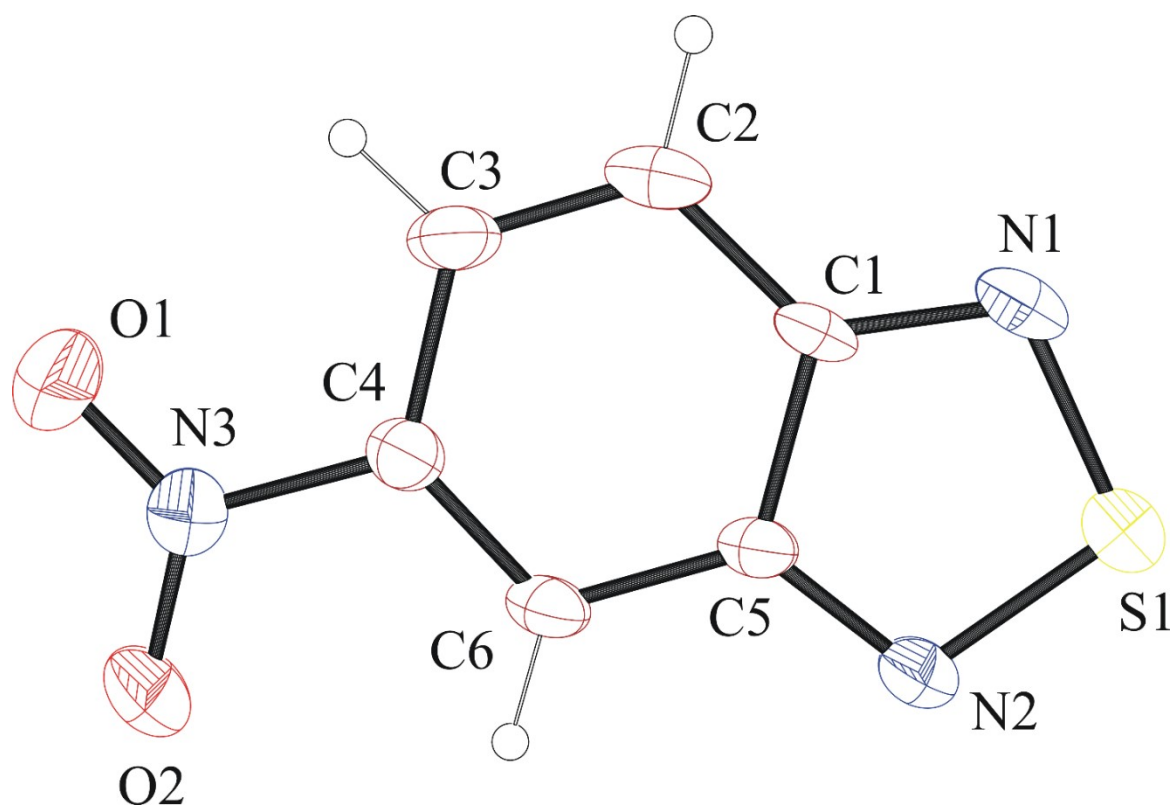

Fig. S2. ORTEP diagram of the molecular structure of **1** in polymorph II at 293 K. Thermal ellipsoids are drawn at 30 % probability level.

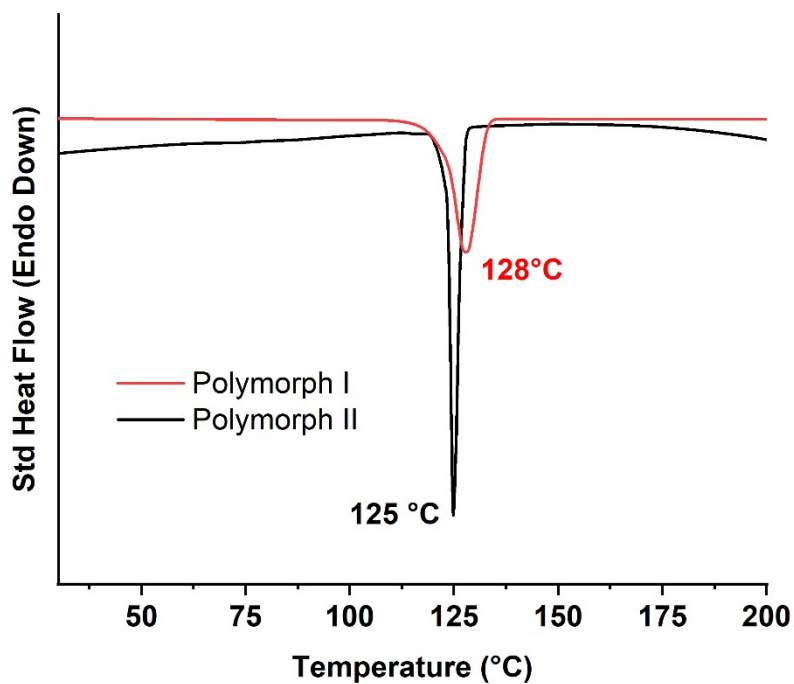

Fig. S3. DSC thermograms, on heating, of samples of polymorphs I and II of compound **1**. Heating rate is 10 °C/min, under flowing N<sub>2</sub>.

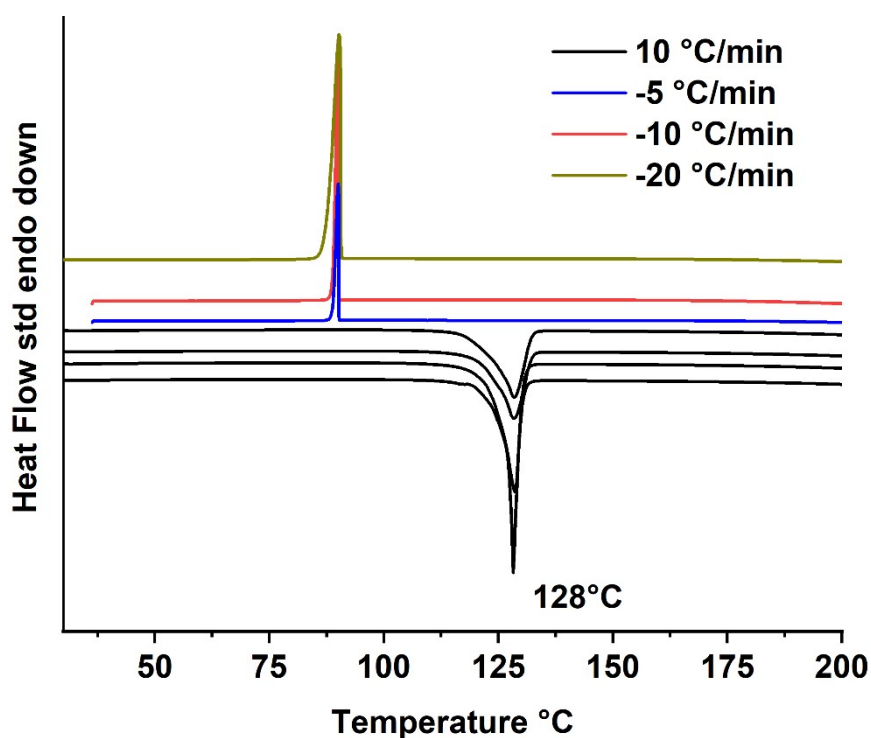

Fig. S4. DSC thermograms, on heating (black curves), of samples of compound **1** obtained by cooling the liquid phase at different cooling rates (5 °C/min blue curve, 10 °C/min red curve, and 20 °C/min brown curve). Heating rate is 10 °C/min in all cases. Measurements performed under flowing N<sub>2</sub>.

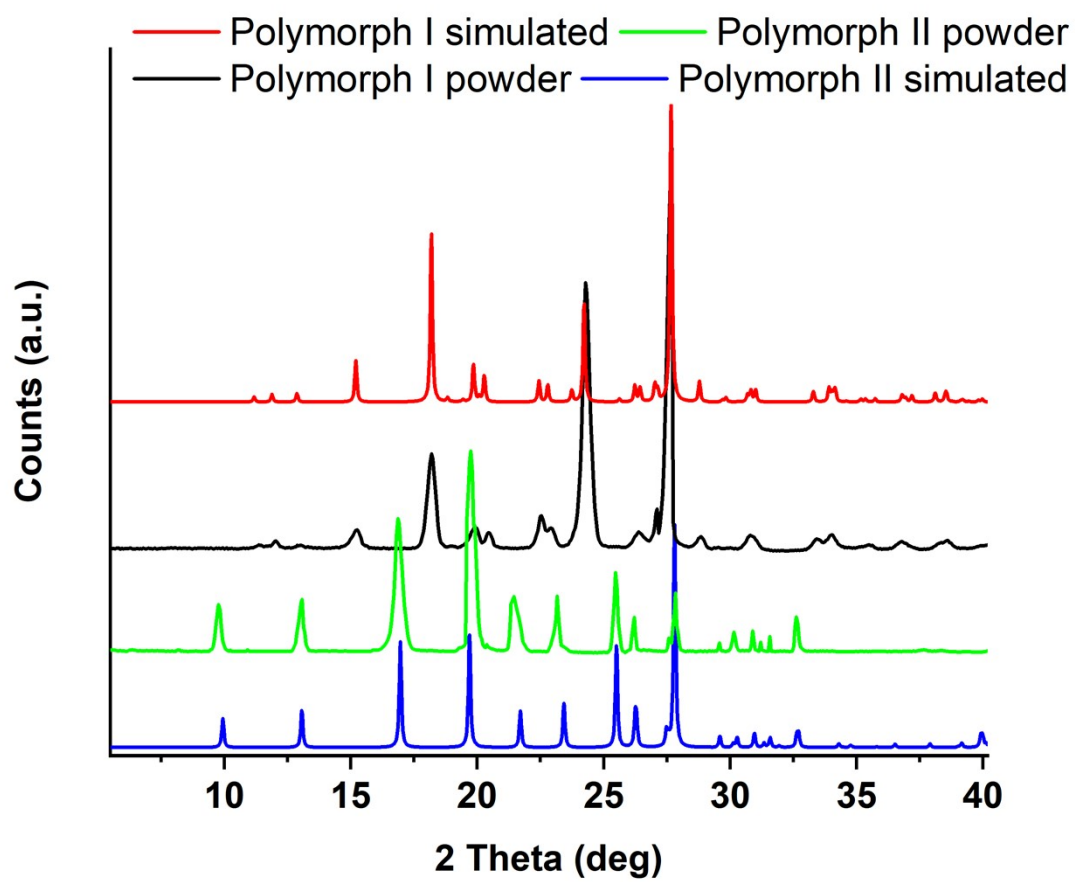

Fig. S5. Experimental and simulated powder diffraction patterns of polymorphs I and II of **1**. CuK $\alpha$  radiation was used in all cases.

Table S1. Initial and final optimized cell parameters for actual and virtual crystal structures of **1**, at 0 K.

|    | Space group  | Initial lattice parameters <sup>(a)</sup>                                                                                  | Optimized lattice parameters at 0 K                                                                       |
|----|--------------|----------------------------------------------------------------------------------------------------------------------------|-----------------------------------------------------------------------------------------------------------|
| A1 | $P\bar{1}$   | a=5.7385(4) Å $\alpha=112.262(2)^\circ$<br>b=7.8571(5) Å $\beta=93.986(2)^\circ$<br>c=8.3539(5) Å $\gamma=91.902(2)^\circ$ | a=5.4402 Å $\alpha=113.029^\circ$<br>b=7.4196 Å $\beta=93.3165^\circ$<br>c=8.2797 Å $\gamma=96.122^\circ$ |
| A2 | $Pc$         | a=3.812(3) Å $\alpha=90^\circ$<br>b=8.905(4) Å $\beta=95.02(4)^\circ$<br>c=10.498(5) Å $\gamma=90^\circ$                   | a=3.6099 Å $\alpha=90^\circ$<br>b=8.7323 Å $\beta=89.48^\circ$<br>c=9.7339 Å $\gamma=90^\circ$            |
| V1 | $P2_1/c$     | a=9.8560(11) Å $\alpha=90^\circ$<br>b=3.8407(4) Å $\beta=102.777(4)^\circ$<br>c=18.626(2) Å $\gamma=90^\circ$              | a=10.0709 Å $\alpha=90^\circ$<br>b=3.4310 Å $\beta=101.261^\circ$<br>c=18.4084 Å $\gamma=90^\circ$        |
| V2 | $P2_1/c$     | a=10.1467(13) Å $\alpha=90^\circ$<br>b=4.8078(6) Å $\beta=97.320(3)^\circ$<br>c=13.8542(17) Å $\gamma=90^\circ$            | a=8.9824 Å $\alpha=90^\circ$<br>b=5.2876 Å $\beta=89.773^\circ$<br>c=13.1096 Å $\gamma=90^\circ$          |
| V3 | $P2_12_12_1$ | a=3.9535(3) Å $\alpha=90^\circ$<br>b=11.7197(10) Å $\beta=90^\circ$<br>c=13.7875(12) Å $\gamma=90^\circ$                   | a=3.4480 Å $\alpha=90^\circ$<br>b=13.7005 Å $\beta=90^\circ$<br>c=13.29205 Å $\gamma=90^\circ$            |
| V4 | $P2_1/c$     | a=13.2549(6) Å $\alpha=90^\circ$<br>b=3.8667(2) Å $\beta=109.309(2)^\circ$<br>c=13.0731(6) Å $\gamma=90^\circ$             | a=15.6219 Å $\alpha=90^\circ$<br>b=3.5893 Å $\beta=113.141^\circ$<br>c=12.3234 Å $\gamma=90^\circ$        |
| V5 | $P\bar{1}$   | a=8.4896(5) Å $\alpha=70.833(2)^\circ$<br>b=9.8602(6) Å $\beta=83.675(2)^\circ$<br>c=10.0057(6) Å $\gamma=84.293(2)^\circ$ | a=7.7295 Å $\alpha=74.458^\circ$<br>b=9.4201 Å $\beta=86.354^\circ$<br>c=9.1012 Å $\gamma=88.015^\circ$   |
| V6 | $P2_1/c$     | a=7.3545(6) Å $\alpha=90^\circ$<br>b=15.0337(12) Å $\beta=104.4670(10)^\circ$<br>c=8.7923(7) Å $\gamma=90^\circ$           | a=5.7593 Å $\alpha=90^\circ$<br>b=14.8756 Å $\beta=88.0002^\circ$<br>c=7.4178 Å $\gamma=90^\circ$         |
| V7 | $P2_1/c$     | a=16.3500(7) Å $\alpha=90^\circ$<br>b=4.6387(2) Å $\beta=102.521(4)^\circ$<br>c=14.6202(6) Å $\gamma=90^\circ$             | a=10.1515 Å $\alpha=90^\circ$<br>b=5.9762 Å $\beta=114.049^\circ$<br>c=11.5446 Å $\gamma=90^\circ$        |

(a) In the case of A1 and A2 the initial lattice parameters are those of the corresponding room temperature crystal structures of polymorphs I and II respectively. For V1, V2, V3, V4, V5, V6 and V7 the initial lattice parameters are those of the experimental structures with CSD refcodes JIWPAP, JIWWEU, JIWWUK, DOLROO, JIXFII, REBHIQ and GASFAK respectively (see Chart 2 of the typescript).

In the case of actual crystal structures, A1 and A2, the agreement between optimized and experimental lattice parameters is within 7%, with optimized unit cell lengths systematically lower than experimental ones, because optimization is at 0 K, while experimental lattice parameters are measured at room temperature. As we have shown in previous papers (see ESI of reference 1 and SI file of reference 2), a better agreement, within 3%, is obtained if experimental lattice parameters are determined at 173 K.

## Reference

- 1 R. Centore, M. Causà, F. Cerciello, F. Capone, and S. Fusco, *CrystEngComm* 2014, **16**, 9168-9175.
- 2 R. Centore, S. Fusco, F. Capone, and M. Causà, *Cryst. Growth Des.* 2016, **16**, 2260–2265.

## Crystal structure, in CIF format, for the optimized actual and virtual structures at 0 K

```
data_A1_GINTII_polymorph_I
_symmetry_cell_setting      triclinic
_symmetry_space_group_name_H-M 'P -1'
_symmetry_Int_Tables_number 2
_space_group_name_Hall      '-P 1'
loop_
_symmetry_equiv_pos_site_id
_symmetry_equiv_pos_as_xyz
1 x,y,z
2 -x,-y,-z
_cell_length_a              5.4402
_cell_length_b              7.4196
_cell_length_c              8.2797
_cell_angle_alpha           113.029
_cell_angle_beta            93.3165
_cell_angle_gamma           96.122
_cell_volume                 303.9986
loop_
_atom_site_label
_atom_site_type_symbol
_atom_site_fract_x
_atom_site_fract_y
_atom_site_fract_z
O1 O -0.465467399 0.377568835 -0.242046366
N1 N 0.341937763 0.186341421 0.207399679
O2 O -0.296764468 0.162818002 -0.453973841
S1 S 0.229135566 0.318088357 0.397591857
N2 N -0.309563045 0.262134534 -0.295117948
N3 N -0.011769266 0.385451455 0.308994501
C1 C -0.007342488 0.306840060 0.133924037
C2 C -0.177568332 0.330148761 0.009264883
H1 H -0.328269233 0.416272044 0.051593025
C3 C -0.136931322 0.242487056 -0.165017295
C4 C 0.064093496 0.133227625 -0.225319179
H2 H 0.085834551 0.072711054 -0.364753545
C5 C 0.227673251 0.105914748 -0.107799466
H3 H 0.377822633 0.018302558 -0.151678583
C6 C 0.196154505 0.193845484 0.075489200
```

```

data_A2_polymorph_II
_symmetry_cell_setting      monoclinic
_symmetry_space_group_name_H-M 'P c'
_symmetry_Int_Tables_number 7
_space_group_name_Hall      'P -2yc'
loop_
_symmetry_equiv_pos_site_id
_symmetry_equiv_pos_as_xyz
1 x,y,z
2 x,-y,1/2+z
_cell_length_a              3.6099
_cell_length_b              8.7323
_cell_length_c              9.7339
_cell_angle_alpha           90
_cell_angle_beta            89.480
_cell_angle_gamma           90
_cell_volume                 306.8257
loop_
_atom_site_label
_atom_site_type_symbol
_atom_site_fract_x
_atom_site_fract_y
_atom_site_fract_z
C1 C  -0.240865212  0.420569283 -0.074156536
C2 C  -0.290636397  0.266217595 -0.119491927
H1 H  -0.453006936  0.242394310 -0.210496559
C3 C  -0.146318627  0.150595081 -0.041407789
H2 H  -0.184795987  0.031920780 -0.070562174
C4 C   0.053413652  0.184828790  0.081298096
C5 C  -0.041945485  0.451374136  0.051681468
C6 C   0.112921553  0.330333403  0.129018645
H2 H   0.280124852  0.355529616  0.218120164
N1 N  -0.366559054 -0.452579347 -0.134635871
N2 N  -0.018028096 -0.400471975  0.085262866
N3 N   0.208095781  0.059962562  0.160123305
O1 O   0.147527548 -0.073478128  0.122923501
O2 O   0.398861138  0.090758250  0.262828312
S1 S  -0.236511730 -0.302404155 -0.037072502

```



```

data_V1_1_virt_optimized_in_JIWWAP
_symmetry_cell_setting      monoclinic
_symmetry_space_group_name_H-M 'P 21/c'
_symmetry_Int_Tables_number 14
_space_group_name_Hall      '-P 2ybc'
loop_
_symmetry_equiv_pos_site_id
_symmetry_equiv_pos_as_xyz
1 x,y,z
2 -x,1/2+y,1/2-z
3 -x,-y,-z
4 x,1/2-y,1/2+z
_cell_length_a              10.0709
_cell_length_b              3.4310
_cell_length_c              18.4084
_cell_angle_alpha           90
_cell_angle_beta            101.261
_cell_angle_gamma           90
_cell_volume                 623.81925
loop_
_atom_site_label
_atom_site_type_symbol
_atom_site_fract_x
_atom_site_fract_y
_atom_site_fract_z
C1 C -0.260728170 0.440324336 -0.293894013
C2 C -0.315812871 -0.316047319 -0.439760789
C3 C -0.159571625 0.381362268 -0.333215019
H1 H -0.064560792 0.243203270 -0.309025988
C4 C -0.389239956 -0.392228915 -0.324453609
H2 H -0.463732600 -0.359941685 -0.289678467
C5 C -0.418412028 -0.275360098 -0.396831666
H3 H 0.485265160 -0.142258646 -0.421140209
C6 C -0.185789416 -0.486600422 -0.407658917
S1 S -0.176002829 -0.303469171 0.465566059
N1 N -0.324683329 -0.202929560 0.489931195
N2 N -0.098248770 -0.497703954 -0.453813197
N3 N -0.234441799 0.332717713 -0.216293336
N4 O -0.127120289 0.160142121 -0.190126041
O1 O -0.320180664 0.421325296 -0.178759643

```

```

data_V2_1_virt_optimized_in_JIWWEU
_symmetry_cell_setting      monoclinic
_symmetry_space_group_name_H-M 'P 21/c'
_symmetry_Int_Tables_number 14
_space_group_name_Hall      '-P 2ybc'
loop_
_symmetry_equiv_pos_site_id
_symmetry_equiv_pos_as_xyz
1 x,y,z
2 -x,1/2+y,1/2-z
3 -x,-y,-z
4 x,1/2-y,1/2+z
_cell_length_a              8.9824
_cell_length_b              5.2876
_cell_length_c              13.1096
_cell_angle_alpha           90
_cell_angle_beta            89.773
_cell_angle_gamma           90
_cell_volume                 622.6446
loop_
_atom_site_label
_atom_site_type_symbol
_atom_site_fract_x
_atom_site_fract_y
_atom_site_fract_z
S1 S    0.154272005 0.189805697 0.032174644
O1 O    -0.488117928 0.173974719 -0.138734788
O2 O    0.358848453 0.238912835 -0.264591116
N1 N    0.070879199 0.271845765 -0.079386440
N2 N    0.290548269 0.405761561 0.029874631
N3 N    0.406183858 0.107299102 -0.193405013
C1 C    0.148206427 0.466415757 -0.117767675
C2 C    0.121503310 -0.403919783 -0.211807903
H1 H    0.033504529 -0.464558598 -0.262750749
C3 C    0.211460414 -0.204947107 -0.237375996
H2 H    0.197850798 -0.104979832 -0.309003409
C4 C    0.328220870 -0.126045975 -0.170511597
C5 C    0.364966144 -0.249727120 -0.082647199
H3 H    0.456567455 -0.192184890 -0.034634084
C6 C    0.273143317 -0.457328308 -0.054639887

```

```

data_V3_1_virt_optimized_in_JIWWUK
_symmetry_cell_setting      orthorhombic
_symmetry_space_group_name_H-M 'P 21 21 21'
_symmetry_Int_Tables_number 19
_space_group_name_Hall      'P 2ac 2ab'
loop_
_symmetry_equiv_pos_site_id
_symmetry_equiv_pos_as_xyz
1 x,y,z
2 1/2+x,1/2-y,-z
3 -x,1/2+y,1/2-z
4 1/2-x,-y,1/2+z
_cell_length_a              3.4480
_cell_length_b              13.7005
_cell_length_c              13.29205
_cell_angle_alpha           90
_cell_angle_beta            90
_cell_angle_gamma           90
_cell_volume                 627.9135
loop_
_atom_site_label
_atom_site_type_symbol
_atom_site_fract_x
_atom_site_fract_y
_atom_site_fract_z

S1 S  -0.121198672  0.359896925 -0.434913624
O1 O   0.346290074 -0.223428882  0.375726035
O2 O   0.024660612 -0.286603432  0.249942304
N1 N  -0.286373362  0.337277133  0.448160546
N2 N  -0.209824216  0.480037270 -0.431924450
N3 N   0.231919142 -0.294688835  0.325907617
C1 C   0.402332441  0.436183880  0.315497805
H1 H   0.356246773  0.374717327  0.265285301
C2 C   0.347126912 -0.391947092  0.357185202
C3 C   0.281327054 -0.471853882  0.290128821
H2 H   0.127362750 -0.459564365  0.220152842
C4 C  -0.416893436  0.421879566  0.411000329
C5 C  -0.370547138 -0.496407305  0.479573897
C6 C  -0.485825840 -0.401313614  0.450457058
H3 H  -0.446113559 -0.339900082 -0.499295947

```

data\_V4\_1\_virt\_optimized\_in\_DOLROO  
\_symmetry\_cell\_setting monoclinic  
\_symmetry\_space\_group\_name\_H-M 'P 21/c'  
\_symmetry\_Int\_Tables\_number 14  
\_space\_group\_name\_Hall '-P 2ybc'

loop\_

\_symmetry\_equiv\_pos\_site\_id  
\_symmetry\_equiv\_pos\_as\_xyz

1 x,y,z  
2 -x,1/2+y,1/2-z  
3 -x,-y,-z  
4 x,1/2-y,1/2+z

\_cell\_length\_a 15.6219  
\_cell\_length\_b 3.5893  
\_cell\_length\_c 12.3234  
\_cell\_angle\_alpha 90  
\_cell\_angle\_beta 113.141  
\_cell\_angle\_gamma 90  
\_cell\_volume 635.4040

loop\_

\_atom\_site\_label  
\_atom\_site\_type\_symbol  
\_atom\_site\_fract\_x  
\_atom\_site\_fract\_y  
\_atom\_site\_fract\_z

C1 C -0.308559570 0.482850150 0.467193549  
C2 C -0.326326258 0.324781089 -0.435344581  
C3 C -0.256603649 0.334649352 -0.318927984  
H1 H -0.269267408 0.208169623 -0.246660260  
C4 C -0.173864657 -0.497599639 -0.305158064  
C5 C -0.156261290 -0.325700970 -0.398972610  
H2 H -0.090482153 -0.185343283 -0.380107721  
C6 C -0.222805661 -0.333343210 0.488646197  
H3 H -0.211301246 -0.196162088 0.417345851  
N1 N -0.379168355 0.441327453 0.362345798  
N2 N -0.410351477 0.168577715 -0.467174509  
N3 N -0.098742186 -0.496880343 -0.187890888  
O1 O -0.109358783 0.318144492 -0.108887004  
O2 O -0.028144472 -0.312492144 -0.173457162  
S1 S -0.4654444320 0.219616008 0.385922802

```

data_V5_1_virt_optimized_in_JIXFII
_symmetry_cell_setting      triclinic
_symmetry_space_group_name_H-M 'P -1'
_symmetry_Int_Tables_number 2
_space_group_name_Hall      '-P 1'
loop_
_symmetry_equiv_pos_site_id
_symmetry_equiv_pos_as_xyz
1 x,y,z
2 -x,-y,-z
_cell_length_a              7.7295
_cell_length_b              9.4201
_cell_length_c              9.1012
_cell_angle_alpha           74.458
_cell_angle_beta            86.354
_cell_angle_gamma           88.015
_cell_volume                 637.052
loop_
_atom_site_label
_atom_site_type_symbol
_atom_site_fract_x
_atom_site_fract_y
_atom_site_fract_z
S1 S 0.332455270 0.994021934 -0.325082748
N1 N 0.209615224 1.065728701 -0.202913935
N2 N 0.445847011 0.870645193 -0.195806184
C1 C 0.249969481 0.937430939 0.207843761
N3 N 0.181261614 0.960893168 0.352113197
O1 O 0.144521023 1.088301086 0.358641697
O2 O 0.165974907 0.849711016 0.462051098
C2 C 0.256117494 0.996040645 -0.062187915
C3 C 0.390115105 0.883209645 -0.057970967
C4 C 0.376515935 0.821994350 0.215460631
H1 H 0.415244567 0.757762051 0.326478834
C5 C 0.188126087 1.025357605 0.075945256
H2 H 0.093420201 1.113009857 0.077975709
C6 C 0.450390513 0.796959112 0.083986508
H3 H 0.548499358 0.710594665 0.087849266
S2 S 0.172724206 0.626788549 -0.206211620
N4 N 0.289626615 0.498483493 -0.085934494
N5 N 0.064018823 0.697016214 -0.074942877
C7 C 0.247193081 0.510189366 0.055545215
C8 C 0.135148347 0.568525580 0.334107612
H4 H 0.101832930 0.589002099 0.444183036
C9 C 0.117621877 0.623702475 0.062299260
C10 C 0.32045854 0.425106349 0.191259372
H5 H 0.415452250 0.337405574 0.191505187
C11 C 0.05985078 0.649518327 0.205067970
H6 H -0.03718830 0.734766780 0.209974770
C12 C 0.265313461 0.45971300 0.324158205
N6 N 0.351818728 0.384915239 0.461429743

```

O3 O 0.468913859 0.293525582 0.451736837

O4 O 0.308541585 0.417644669 0.582633636

```

data_V6_1_virt_optimized_in_REBHIQ
_symmetry_cell_setting      monoclinic
_symmetry_space_group_name_H-M 'P 21/c'
_symmetry_Int_Tables_number 14
_space_group_name_Hall      '-P 2ybc'
loop_
_symmetry_equiv_pos_site_id
_symmetry_equiv_pos_as_xyz
1 x,y,z
2 -x,1/2+y,1/2-z
3 -x,-y,-z
4 x,1/2-y,1/2+z
_cell_length_a              5.7593
_cell_length_b              14.8756
_cell_length_c              7.4178
_cell_angle_alpha           90
_cell_angle_beta            88.000
_cell_angle_gamma           90
_cell_volume                 635.125
loop_
_atom_site_label
_atom_site_type_symbol
_atom_site_fract_x
_atom_site_fract_y
_atom_site_fract_z
H1 H 0.737085023 0.660478226 0.339342580
H2 H 0.749496768 0.534034539 0.556079489
H3 H 0.752815002 0.477492540 -0.114646134
C1 C 0.743739369 0.573935157 0.102440280
C2 C 0.743128215 0.591371001 0.291842321
C3 C 0.749983118 0.521160406 0.411975682
C4 C 0.756577295 0.431117525 0.344858989
C5 C 0.756978916 0.416330053 0.151999776
C6 C 0.750924410 0.488944943 0.029684011
N1 N 0.763702155 0.329839458 0.104394210
N2 N 0.762310513 0.354906258 0.440832646
N3 N 0.737863708 0.648213279 -0.023632289
O1 O 0.738678568 0.630199549 -0.187830835
O2 O 0.732532634 0.725729206 0.037052343
S1 S 0.7679393166 0.268740375 0.291747964

```

```

data_V7_1_virt_optimized_in_GASFAK
_symmetry_cell_setting      monoclinic
_symmetry_space_group_name_H-M 'P 21/c'
_symmetry_Int_Tables_number 14
_space_group_name_Hall      '-P 2ybc'
loop_
_symmetry_equiv_pos_site_id
_symmetry_equiv_pos_as_xyz
1 x,y,z
2 -x,1/2+y,1/2-z
3 -x,-y,-z
4 x,1/2-y,1/2+z
_cell_length_a              10.1515
_cell_length_b              5.9762
_cell_length_c              11.5446
_cell_angle_alpha           90
_cell_angle_beta            114.049
_cell_angle_gamma           90
_cell_volume                 639.589
loop_
_atom_site_label
_atom_site_type_symbol
_atom_site_fract_x
_atom_site_fract_y
_atom_site_fract_z
H1 H 0.272930609 0.636694618 -0.088709674
H2 H 0.408419688 0.275206617 -0.015728514
H3 H 0.241519744 0.188500491 0.270675496
C1 C 0.177726953 0.615118450 0.049612233
C2 C 0.265474933 0.537644823 -0.012637766
C3 C 0.338886937 0.340389335 0.027095556
C4 C 0.326130338 0.215789655 0.128161795
C5 C 0.247624923 0.285352196 0.193807553
C6 C 0.173042541 0.490839044 0.155893500
N1 N 0.400547098 0.003674008 0.165065881
N2 N 0.096716819 0.799710079 0.022154964
N3 N 0.092425965 0.584995901 0.209373738
O1 O 0.386747824 -0.106580185 0.251202278
O2 O 0.473535873 -0.062737524 0.108112482
S1 S 0.021511004 0.819474157 0.128558907

```
